# Supplementary material
Source: Springer Nature journal article supplement (https://www.springermedizin.de/resource/supplementary/12885_2010_2697_MOESM5_ESM.pdf/9461742)

Conditions:

optimal

prevailing *in vivo*

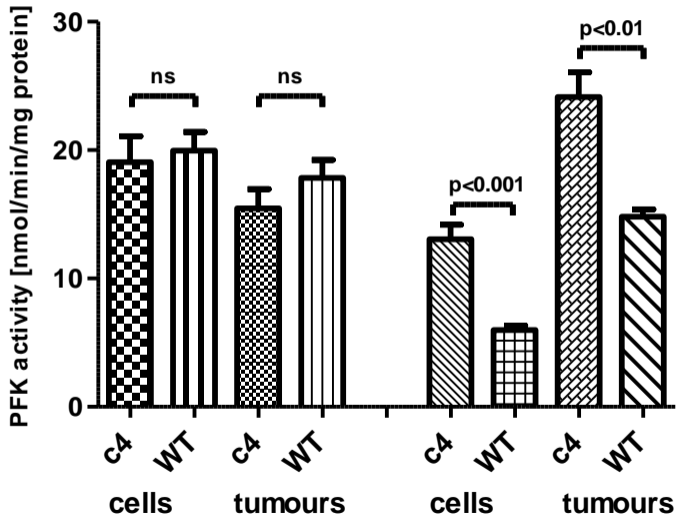

Supplement: MOESM5 [file 9461742]
